# Supplementary material
Source: publisher site journal article supplement (https://www.spandidos-publications.com/4046/downloadSupplementary)
Supplement: Supplementary file 1 [file downloadSupplementary]

## Sheet: Found-not-found
Table SVII. Hallmarks of cancer and alternate splicing.
This table is comparing oncogenes from the publication of Sveen A, et al (PMID: 26300000) with oncogenes found in this DS study.
This underlines other observations, that alternate splicing as an additional switch in the action of oncogenes (see discussion).
Description
Found: found in our study
Not found: not found in our study
Found similar: found similar members of molecular families and ligands of molecules
	Found	Not found	Found similar
Sveen et al, Figure 1B
	VEGFA	BCL2L1	BCL2L13
		CD44
		RAC1
Sveen et al, Figure 2
	BIRC5	BCL2L1	BCL2L13
	MDM2	CASP2
	MCL1	CASP8
		CASP9
		CFLAR
		TP53	TP53BP1
	MAX	GLS	/
	PKM	LDHC
		PFKFB3
	/	AR	/
		BRAF
		CCND1
		EGFR
		FGFR2
		HRAS
		KRAS
		PTEN
		RAC1
	/	AIMP2
		ANXA7
		BIN1
		RB1
		TP53	TP53BP1	TP53BP2
	/	CEACAM1	/
		HLA-G
		IL7
	/	TERT	/
	STAT3	CD44	/
		IRF3
		PPARA
		RAC1
	CTTN	CD44	/
	CDH11	CD82
	TNC	ENHA
		FGFR2
		FAM3B
		KLF6
		MST1R
		RAC1
	FN1	/	/
	VEGFA
	MLH1	MRE11A	/
		RAC1

## Sheet: Groups
Groups, where genes could be found
		Note: Some similar family members considered too
	JC
	R workspace	Gene	Position	Differential Splicing	Splice type
Sveen et al, Figure 1B
	search.n1	VEGFA	43780731	D	SE
		BCL2L13	17683213	B2	MX
		BCL2L13	17683213	C2	MX
		BCL2L13	17702242	G1 erg	SE
		BCL2L13	17696140	G1 erg	MX
		BCL2L13	17696140	H1 erg	MX
		BCL2L13	17683213	G1 erg	MX
		BCL2L13	17683213	H1 erg	MX
Sveen et al, Figure 2
	search.n2	BCL2L13	17683213	B2	MX
		BCL2L13	17683213	C2	MX
		BCL2L13	17683213	G1 erg	MX
		BCL2L13	17683213	H1 erg	MX
		BCL2L13	17696140	G1 erg	MX
		BCL2L13	17696140	H1 erg	MX
		BCL2L13	17702242	G1 erg	SE
		BIRC5	78215965	E1	SE
		BIRC5	78215965	E2	SE
		BIRC5	78216663	E1	SE
		BIRC5	78216663	E2	SE
		BIRC5	78216663	G2 fli	SE
		BIRC5	78216663	H2 fli	SE
		MCL1	150578243	D	SE
		MCL1	150578243	E1	SE
		MDM2	68813553	B	SE
		MDM2	68813553	B2	SE
		MDM2	68813553	C1	SE
		MDM2	68813553	C2	SE
		MDM2	68813553	E2	SE
		MDM2	68813553	E3	MX
		MDM2	68814602	H2 fli	SE
		MDM2	68815627	H2 fli	SE
		TP53BP1	43446765	C1	SE
		TP53BP1	43446765	G1 erg	SE
		TP53BP1	43446765	G2 fli	SE
		TP53BP2	223818205	C2	SE
		TP53BP2	223818205	G1 erg	SE
		TP53BP2	223818205	H1 erg	SE
	search.n3	PKM	72202453	B2	MX
		PKM	72202453	D	MX
		PKM	72202453	G1 erg	MX
		PKM	72202453	G2 fli	MX
		PKM	72202453	H1 erg	MX
		PKM	72202453	H2 fli	MX
		PKM	72202453	E1	MX
		PKM	72202453	E2	MX
		MAX	65101545	H2 fli	SE
		MAX	65101545	G2 fli	SE
		VCPKMT	50112614	G2 fli	SE
	search.n4	-
	search.n5	TP53BP1	43446765	C1	SE
		TP53BP1	43446765	G1 erg	SE
		TP53BP1	43446765	G2 fli	SE
		TP53BP2	223818205	H1 erg	SE
		TP53BP2	223818205	C2	SE
		TP53BP2	223818205	G1 erg	SE
	search.n6	-
	search.n7	-
	search.n8	STAT3	42322281	E3	A5
	search.n9	CTTN	70421469	G2 fli	SE
		CTTN	70421469	H2 fli	SE
		CTTN	70421469	E2	SE
		CDH11	64948608	H1 erg	SE
		CDH11	64948608	H2 fli	SE
		TNC	115062916	E1	SE
	search.n10	FN1	215371908	B2	A3
		FN1	215371908	B2	A3
		FN1	215371908	B2	A3
		FN1	215371908	D	A3
		FN1	215371908	D	A3
		FN1	215371908	D	A3
		FN1	215371908	B2	RI
		FN1	215371908	D	RI
		FN1	215371908	E1	A3
		FN1	215371908	E1	A3
		FN1	215371908	G2 fli	RI
		FN1	215371908	E2	A3
		FN1	215371908	E2	A3
		FN1	215371908	E2	A3
		FN1	215372108	D	SE
		FN1	215372108	B2	SE
		FN1	215372108	B2	SE
		FN1	215372108	E2	SE
		FN1	215379129	B2	RI
		FN1	215379129	D	RI
		FN1	215379129	E1	RI
		FN1	215379129	E2	RI
		FN1	215380810	B2	SE
		FN1	215380810	E1	SE
		FN1	215380810	D	SE
		FN1	215380810	E2	SE
		FN1	215384019	C1	RI
		FN1	215384019	E3	RI
		FN1	215384019	E2	RI
		FN1	215392930	B2	SE
		FN1	215392930	B	SE
		FN1	215392930	D	SE
		FN1	215392930	C1	SE
		FN1	215392930	C2	SE
		FN1	215392930	G2 fli	SE
		FN1	215392930	H2 fli	SE
		FN1	215392930	E1	SE
		FN1	215392930	E2	SE
		MFN1	179378340	C2	RI
		SLFN11	35367540	H1 erg	A5
		SLFN11	35367540	B2	A5
		VEGFA	43780731	D	SE
		VEGFA	43780731	D	SE
	search.n11	MLH1	37017505	G2 fli	MX
		MLH1	37042267	E1	MX
